# Supplementary material for: An atlas of gastric PIWI-interacting RNA transcriptomes and their utility for identifying signatures of gastric cancer recurrence
Source: Springer Nature journal article supplement (doi:10.1007/s10120-015-0487-y), 2015-03-16
Supplement: 10120_2015_487_MOESM1_ESM.pdf [file 10120_2015_487_MOESM1_ESM.pdf]

| <b>piRNA</b> | <b>FDR p value</b> | <b>Average Fold Change</b> |
|--------------|--------------------|----------------------------|
| FR222326     | 0.0005695          | 195.6512                   |
| FR162144     | 0.0005695          | 39.9944                    |
| FR233520     | 0.0005695          | 37.1228                    |
| FR144444     | 0.0005695          | 33.5105                    |
| FR073001     | 0.0005695          | 32.1485                    |
| FR055135     | 0.001439           | 20.5096                    |
| FR149623     | 0.0005695          | 18.6373                    |
| FR086093     | 0.001005           | 17.1912                    |
| FR003121     | 0.001439           | 12.9392                    |
| FR111727     | 0.0005695          | 12.7422                    |
| FR042730     | 0.003425           | 11.2645                    |
| FR184567     | 0.0005695          | 11.0028                    |
| FR217789     | 0.003425           | 10.6626                    |
| FR066510     | 0.0005695          | 9.6372                     |
| FR301184     | 0.0005695          | 8.9356                     |
| FR072519     | 0.003425           | 7.422                      |
| FR206006     | 0.003425           | 7.3764                     |
| FR132045     | 0.0005695          | 7.1398                     |
| FR338565     | 0.001005           | 7.0909                     |
| FR295879     | 0.006133           | 6.5256                     |
| FR326119     | 0.001439           | 6.3802                     |
| FR302680     | 0.0005695          | 6.2213                     |
| FR135042     | 0.0005695          | 6.0508                     |
| FR027884     | 0.0005695          | 6.0508                     |
| FR305534     | 0.001005           | 5.7722                     |
| FR151159     | 0.001005           | 5.7721                     |
| FR010002     | 0.001005           | 5.7721                     |
| FR197104     | 0.0005695          | 5.7138                     |
| FR279668     | 0.0005695          | 5.6848                     |
| FR237180     | 0.0005695          | 5.516                      |
| FR061350     | 0.002753           | 5.3422                     |
| FR035643     | 0.0005695          | 5.2777                     |
| FR263507     | 0.0005695          | 5.2314                     |
| FR262980     | 0.0005695          | 5.2002                     |
| FR132358     | 0.001439           | 5.1124                     |
| FR283482     | 0.0005695          | 5.0461                     |
| FR337552     | 0.006133           | 4.7974                     |
| FR003837     | 0.002753           | 4.5603                     |
| FR019089     | 0.0005695          | 4.4856                     |
| FR197889     | 0.0005695          | 4.4515                     |
| FR372325     | 0.001005           | 4.3116                     |
| FR310293     | 0.0005695          | 4.2678                     |
| FR103462     | 0.0005695          | 4.0342                     |
| FR043670     | 0.0005695          | 3.9188                     |
| FR380227     | 0.003079           | 3.8995                     |
| FR293713     | 0.001005           | 3.8795                     |
| FR270731     | 0.0005695          | 3.6689                     |
| FR381169     | 0.0005695          | 3.6055                     |

|          |           |                                                       |
|----------|-----------|-------------------------------------------------------|
| FR087630 | 0.002753  | 3.5695                                                |
| FR290353 | 0.0005695 | 3.5342                                                |
| FR107946 | 0.0005695 | 3.5005                                                |
| FR324515 | 0.003079  | 3.485                                                 |
| FR365646 | 0.0005695 | 3.4795                                                |
| FR291903 | 0.005003  | 3.4636                                                |
| FR218973 | 0.0005695 | 3.4205                                                |
| FR182987 | 0.0005695 | 3.4124                                                |
| FR213383 | 0.0005695 | 3.3146                                                |
| FR236999 | 0.0005695 | 3.2455                                                |
| FR132879 | 0.0005695 | 3.2369                                                |
| FR319300 | 0.0005695 | 3.1824                                                |
| FR205579 | 0.0005695 | 3.1824                                                |
| FR027151 | 0.001904  | 3.0497                                                |
| FR016773 | 0.002753  | 3.0488                                                |
| FR007639 | 0.003079  | 2.9531                                                |
| FR190827 | 0.0005695 | 2.9294                                                |
| FR338747 | 0.001005  | 2.9168                                                |
| FR140858 | 0.0005695 | 2.8565                                                |
| FR026913 | 0.0005695 | 2.7904                                                |
| FR266905 | 0.0005695 | 2.6882                                                |
| FR131044 | 0.0005695 | 2.6454                                                |
| FR074386 | 0.0005695 | 2.6006                                                |
| FR246367 | 0.0005695 | 2.5234                                                |
| FR064000 | 0.001005  | 2.455                                                 |
| FR387750 | 0.001005  | 2.4421                                                |
| FR157678 | 0.001005  | 2.4421                                                |
| FR341694 | 0.0005695 | 2.3219                                                |
| FR245310 | 0.004616  | 2.2603                                                |
| FR136216 | 0.0005695 | 2.2237                                                |
| FR359148 | 0.0005695 | 2.1672                                                |
| FR380286 | 0.007313  | 2.1411                                                |
| FR236484 | 0.0005695 | 2.1183                                                |
| FR218523 | 0.001439  | 2.1147                                                |
| FR105027 | 0.002753  | 2.0963                                                |
| FR243752 | 0.004616  | 2.0923                                                |
| FR327232 | 0.0005695 | 2.0781                                                |
| FR378984 | 0.001005  | 2.0056                                                |
| FR037883 | 0.0005695 | -2.5229                                               |
| FR252137 | 0.00945   | -2.7919                                               |
| FR232277 | 0.003079  | -2.859                                                |
| FR202919 | 0.0005695 | -2.921                                                |
| FR328873 | 0.0005695 | -3.0352                                               |
| FR157967 | 0.0005695 | -3.0372                                               |
| FR353662 | 0.0005695 | -3.9131                                               |
| FR109932 | 0.0005695 | Exclusively expressed in non-malignant stomach tissue |
| FR337999 | 0.0005695 | Exclusively expressed in non-malignant stomach tissue |
| FR223921 | 0.0005695 | Exclusively expressed in non-malignant stomach tissue |
| FR102859 | 0.0005695 | Exclusively expressed in non-malignant stomach tissue |

|          |           |                                                       |
|----------|-----------|-------------------------------------------------------|
| FR401918 | 0.0005695 | Exclusively expressed in non-malignant stomach tissue |
| FR301892 | 0.0005695 | Exclusively expressed in non-malignant stomach tissue |
| FR024428 | 0.0005695 | Exclusively expressed in non-malignant stomach tissue |
| FR127556 | 0.0005695 | Exclusively expressed in non-malignant stomach tissue |
| FR018977 | 0.0005695 | Exclusively expressed in non-malignant stomach tissue |
| FR054474 | 0.0005695 | Exclusively expressed in non-malignant stomach tissue |
| FR054563 | 0.0005695 | Exclusively expressed in non-malignant stomach tissue |
| FR315253 | 0.0005695 | Exclusively expressed in non-malignant stomach tissue |
| FR188833 | 0.0005695 | Exclusively expressed in non-malignant stomach tissue |
| FR228545 | 0.0005695 | Exclusively expressed in non-malignant stomach tissue |
| FR324253 | 0.0005695 | Exclusively expressed in non-malignant stomach tissue |
| FR242079 | 0.0005695 | Exclusively expressed in non-malignant stomach tissue |
| FR162734 | 0.0005695 | Exclusively expressed in non-malignant stomach tissue |
| FR348796 | 0.0005695 | Exclusively expressed in non-malignant stomach tissue |
| FR106433 | 0.0005695 | Exclusively expressed in gastric adenocarcinoma       |
| FR198390 | 0.0005695 | Exclusively expressed in gastric adenocarcinoma       |
| FR135938 | 0.0005695 | Exclusively expressed in gastric adenocarcinoma       |
| FR337144 | 0.0005695 | Exclusively expressed in gastric adenocarcinoma       |
| FR224235 | 0.0005695 | Exclusively expressed in gastric adenocarcinoma       |
| FR026803 | 0.001005  | Exclusively expressed in gastric adenocarcinoma       |
| FR248059 | 0.0005695 | Exclusively expressed in gastric adenocarcinoma       |
| FR290641 | 0.0005695 | Exclusively expressed in gastric adenocarcinoma       |
| FR321895 | 0.0005695 | Exclusively expressed in gastric adenocarcinoma       |
| FR396827 | 0.0005695 | Exclusively expressed in gastric adenocarcinoma       |
| FR404492 | 0.0005695 | Exclusively expressed in gastric adenocarcinoma       |
| FR248128 | 0.0005695 | Exclusively expressed in gastric adenocarcinoma       |
| FR284409 | 0.001005  | Exclusively expressed in gastric adenocarcinoma       |
| FR030135 | 0.0005695 | Exclusively expressed in gastric adenocarcinoma       |
| FR097339 | 0.0005695 | Exclusively expressed in gastric adenocarcinoma       |
| FR095987 | 0.003079  | Exclusively expressed in gastric adenocarcinoma       |
| FR304927 | 0.0005695 | Exclusively expressed in gastric adenocarcinoma       |
| FR218589 | 0.0005695 | Exclusively expressed in gastric adenocarcinoma       |
| FR202470 | 0.0005695 | Exclusively expressed in gastric adenocarcinoma       |
| FR162794 | 0.0005695 | Exclusively expressed in gastric adenocarcinoma       |
| FR315324 | 0.0005695 | Exclusively expressed in gastric adenocarcinoma       |
| FR148815 | 0.0005695 | Exclusively expressed in gastric adenocarcinoma       |
| FR344447 | 0.0005695 | Exclusively expressed in gastric adenocarcinoma       |
| FR281234 | 0.0005695 | Exclusively expressed in gastric adenocarcinoma       |
| FR372317 | 0.0005695 | Exclusively expressed in gastric adenocarcinoma       |
| FR102402 | 0.001439  | Exclusively expressed in gastric adenocarcinoma       |
| FR196011 | 0.005799  | Exclusively expressed in gastric adenocarcinoma       |
| FR298744 | 0.0005695 | Exclusively expressed in gastric adenocarcinoma       |
| FR133421 | 0.008074  | Exclusively expressed in gastric adenocarcinoma       |
| FR016548 | 0.009169  | Exclusively expressed in gastric adenocarcinoma       |
| FR381182 | 0.00945   | Exclusively expressed in gastric adenocarcinoma       |
| FR070884 | 0.0005695 | Exclusively expressed in gastric adenocarcinoma       |
| FR156205 | 0.0005695 | Exclusively expressed in gastric adenocarcinoma       |
| FR099055 | 0.0005695 | Exclusively expressed in gastric adenocarcinoma       |
| FR277415 | 0.0005695 | Exclusively expressed in gastric adenocarcinoma       |

|          |           |                                                 |
|----------|-----------|-------------------------------------------------|
| FR393260 | 0.0005695 | Exclusively expressed in gastric adenocarcinoma |
| FR267703 | 0.0005695 | Exclusively expressed in gastric adenocarcinoma |
| FR400444 | 0.0005695 | Exclusively expressed in gastric adenocarcinoma |
| FR008494 | 0.0005695 | Exclusively expressed in gastric adenocarcinoma |
| FR157961 | 0.0005695 | Exclusively expressed in gastric adenocarcinoma |
| FR267209 | 0.0005695 | Exclusively expressed in gastric adenocarcinoma |
| FR165524 | 0.0005695 | Exclusively expressed in gastric adenocarcinoma |
| FR121747 | 0.0005695 | Exclusively expressed in gastric adenocarcinoma |
| FR008939 | 0.0005695 | Exclusively expressed in gastric adenocarcinoma |
| FR357447 | 0.0005695 | Exclusively expressed in gastric adenocarcinoma |
