# Supplementary material for: An atlas of gastric PIWI-interacting RNA transcriptomes and their utility for identifying signatures of gastric cancer recurrence
Source: Springer Nature journal article supplement (doi:10.1007/s10120-015-0487-y), 2015-03-16
Supplement: 10120_2015_487_MOESM3_ESM.pdf [file 10120_2015_487_MOESM3_ESM.pdf]

**Article Title:** An atlas of gastric PIWI-Interacting RNA transcriptomes and their utility for identifying signatures of gastric cancer recurrence

**Journal:** Gastric Cancer

**Authors:** Victor D Martinez, Katey SS Enfield, David A. Rowbotham, Wan L Lam

**Affiliations:** Department of Integrative Oncology, BC Cancer Agency, Vancouver, Canada

**Corresponding author email:** vmartinez@bccrc.ca

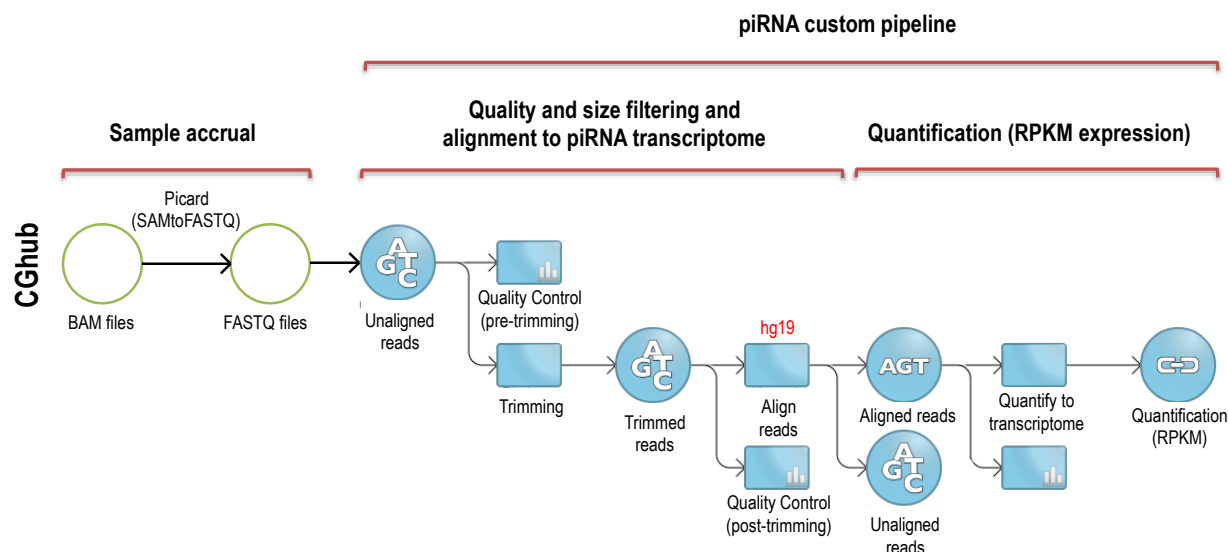

**Supplementary Figure 1. Custom sequence analysis pipeline to characterize piRNA expression in non-malignant stomach tissue and gastric adenocarcinoma.** Flow diagram depicting the three main steps of our custom analysis pipeline (sample accrual, quality control/size-based piRNA enrichment, and data quantification). Circles represent analyzed data, squares represent data processing steps. Green colouring represents files downloaded from The Cancer Genomics Hub (CGHub); blue colouring represents in-house generated data. Raw read sequences and quality scores were extracted using the “SamToFastq” tool in the Picard analysis package (<http://picard.sourceforge.net>). Resulting FASTQ files were trimmed based on quality (Phred quality score  $\geq 20$ ) and size (read length  $\geq 24$  bp), and then re-mapped to human genome (hg19) using STAR aligner (1). Quantification was performed using PartekFlow™ (Partek Inc., MO, USA). Read counts were scaled using the Reads Per Kilobase of exon model per Million mapped reads (RPKM) method (2). We built a custom piRNA reference transcriptome using genomic coordinates obtained from the functional RNA database (v 3.4) (3, 4) available through an fRNAdb track in the UCSC genome browser. MicroRNA sequences (miRBase version 20) had minimal overlap ( $\leq 0.5\%$ ) with piRNA sequences. Circular representation of genome-wide expression in non-malignant and tumour tissue was performed using CircosPlot (5). GEO submission in progress.

## SUPPLEMENTARY REFERENCES

1. Dobin A, Davis CA, Schlesinger F, Drenkow J, Zaleski C, Jha S, et al. STAR: ultrafast universal RNA-seq aligner. *Bioinformatics*. 2013;29(1):15-21. Epub 2012/10/30. doi: 10.1093/bioinformatics/bts635. PubMed PMID: 23104886; PubMed Central PMCID: PMC3530905.
2. Mortazavi A, Williams BA, McCue K, Schaeffer L, Wold B. Mapping and quantifying mammalian transcriptomes by RNA-Seq. *Nature methods*. 2008;5(7):621-8. Epub 2008/06/03. doi: 10.1038/nmeth.1226. PubMed PMID: 18516045.

3. Mituyama T, Yamada K, Hattori E, Okida H, Ono Y, Terai G, et al. The Functional RNA Database 3.0: databases to support mining and annotation of functional RNAs. *Nucleic acids research*. 2009;37(Database issue):D89-92. Epub 2008/10/25. doi: 10.1093/nar/gkn805. PubMed PMID: 18948287; PubMed Central PMCID: PMC2686472.
4. Aravin AA, Hannon GJ, Brennecke J. The Piwi-piRNA pathway provides an adaptive defense in the transposon arms race. *Science*. 2007;318(5851):761-4. Epub 2007/11/03. doi: 10.1126/science.1146484. PubMed PMID: 17975059.
5. Krzywinski M, Schein J, Birol I, Connors J, Gascoyne R, Horsman D, et al. Circos: an information aesthetic for comparative genomics. *Genome research*. 2009;19(9):1639-45. Epub 2009/06/23. doi: 10.1101/gr.092759.109. PubMed PMID: 19541911; PubMed Central PMCID: PMC2752132.
