# Supplementary material for: An atlas of gastric PIWI-interacting RNA transcriptomes and their utility for identifying signatures of gastric cancer recurrence
Source: Springer Nature journal article supplement (doi:10.1007/s10120-015-0487-y), 2015-03-16
Supplement: 10120_2015_487_MOESM4_ESM.pdf [file 10120_2015_487_MOESM4_ESM.pdf]

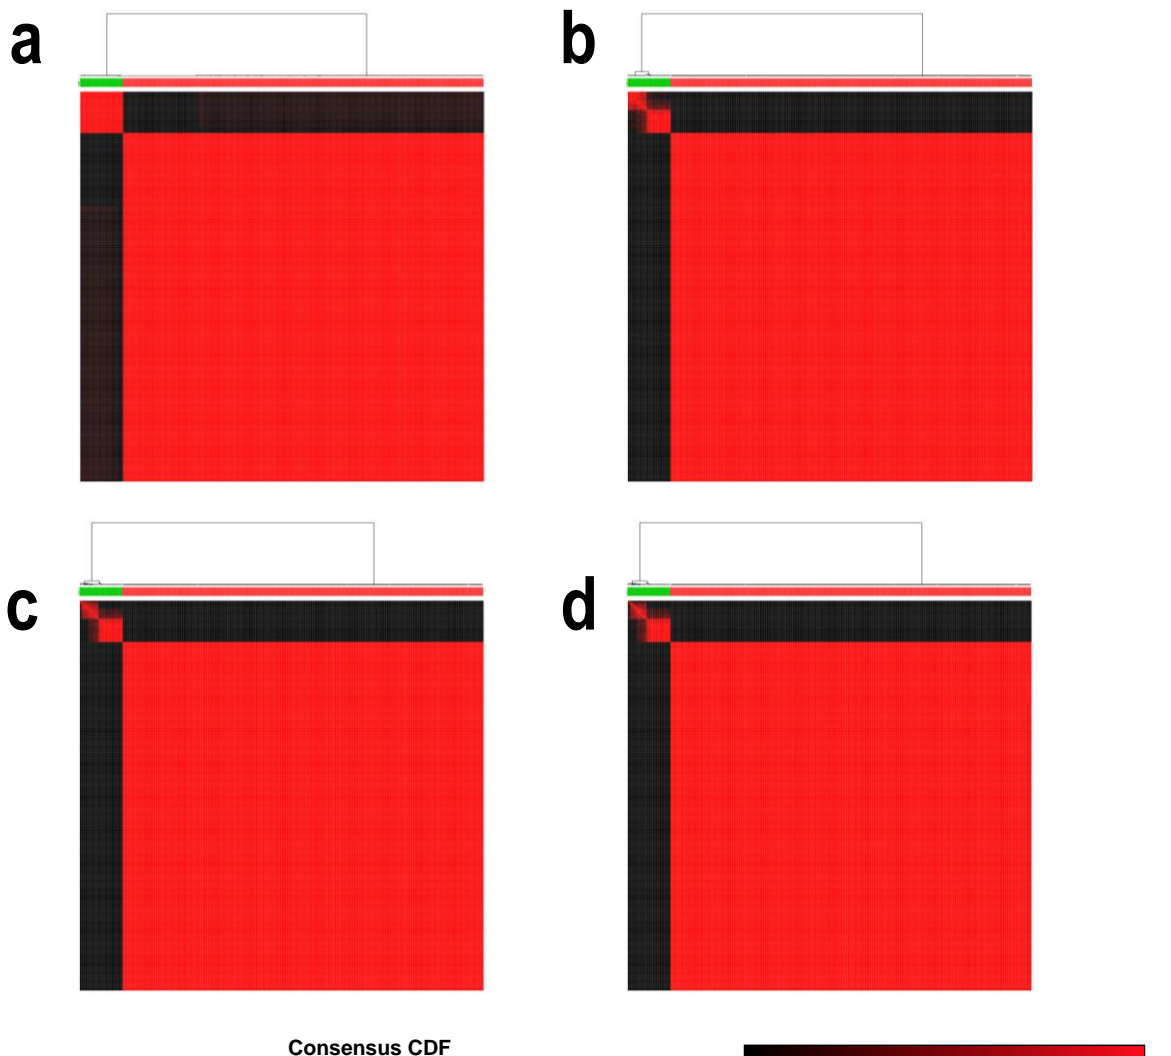

**Consensus CDF**

min max

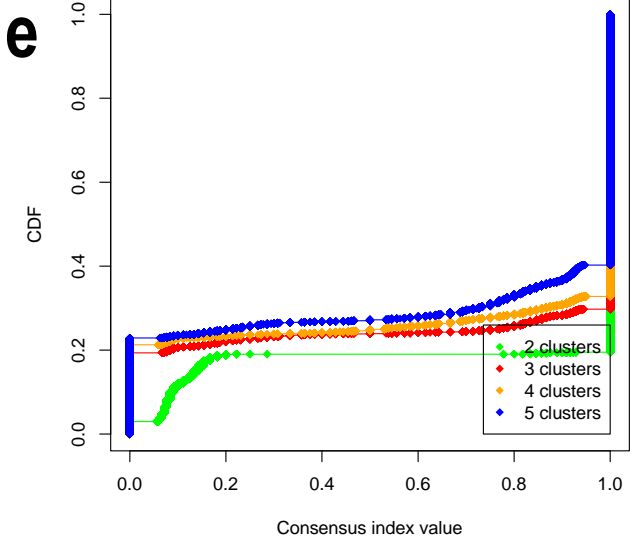

**Supplementary Figure 2. Consensus clustering of 312 piRNAs expressed in non-malignant stomach and gastric adenocarcinoma samples.** Consensus clustering using a  $k_{max}=5$  was performed: A)  $k_{max}=2$ , B)  $k_{max}=3$ , C)  $k_{max}=4$ , D)  $k_{max}=5$ , E) Consensus CDF plot showing the optimal number of clusters is  $k_{max}=2$ , with one cluster containing non-malignant samples, and the other containing GA samples.
